# Supplementary material for: Calcium Ion Richness in Cornus hongkongensis subsp. elegans (W. P. Fang et Y. T. Hsieh) Q. Y. Xiang Could Enhance Its Salinity Tolerance
Source: MDPI journal article supplement (doi:10.3390/f12111522), 2021-11-04
Supplement: s1 [file s1]

**Supplementary Materials:** The following are available online at [www.mdpi.com/xxx/s1](http://www.mdpi.com/xxx/s1), Figure S1. The growth performances of whole plant (a), florescence (b), red leaves in autumn (c), and leaves with plaque-like purple and anthracnose-like spots (d) in *C. elegans* in the field experiment. The photos were taken at Dafeng Forest Farm, Yancheng City, Jiangsu Province. Table S1. The average annual relative growth (AARG) of plant height and basal diameter, and survival rate of *C. elegans* plants in the field observation in 2021. To avoid the impact of individual death and intermediate transplantation, the AARG of plant height and basal diameter was used in this experiment. Its calculation was expressed by dividing the mean difference between the two-survey data (investigated in 2015 and 2021, respectively) by the year apart.

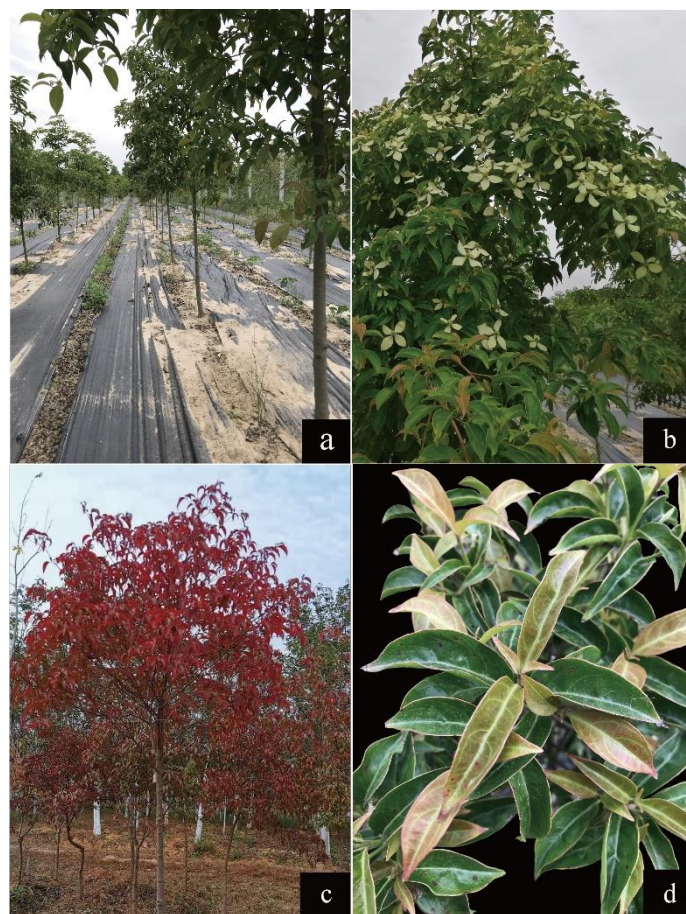

**Figure S1.** The growth performances of whole plant (a), florescence (b), red leaves in autumn (c), and leaves with plaque-like purple and anthracnose-like spots (d) in *C. elegans* in the field experiment. The photos were taken at Dafeng Forest Farm, Yancheng City, Jiangsu Province.

**Table S1.** The average annual relative growth (AARG) of plant height and basal diameter, and survival rate of *C. elegans* plants in the field observation in 2021. To avoid the impact of individual death and intermediate transplantation, the AARG of plant height and basal diameter was used in this experiment. Its calculation was expressed by dividing the mean difference between the two-survey data (investigated in 2015 and 2021, respectively) by the year apart.

| AARG of plant height (cm) | AARG of basal diameter (cm) | Survival rate (%) |
|---------------------------|-----------------------------|-------------------|
| 35.07 ± 0.75              | 1.04 ± 0.01                 | 47.40 ± 1.88      |
