# Supplementary material for: Calcium Ion Richness in Cornus hongkongensis subsp. elegans (W. P. Fang et Y. T. Hsieh) Q. Y. Xiang Could Enhance Its Salinity Tolerance
Source: MDPI journal article supplement (doi:10.3390/f12111522), 2021-11-04
Supplement: s1 [file s1]

Archive with 1 entries (1 files):
- forests-1427130-supplementary.pdf
